1 **Comparison of neural population dynamics in the regression**  
2 **subspace between continuous and categorical task**  
3 **parameters**

4

5 He Chen<sup>12†</sup>, Jun Kunimatsu<sup>3†</sup>, Tomomichi Oya<sup>45</sup>, Yuri Imaizumi<sup>6</sup>, Yukiko Hori<sup>7</sup>,  
6 Masayuki Matsumoto<sup>3</sup>, Takafumi Minamimoto<sup>7</sup>, Yuji Naya<sup>289</sup>, Hiroshi  
7 Yamada<sup>\*3</sup>.

8

9 <sup>1</sup>Mental Health Education Center, University of Chinese Academy of Sciences,  
10 No.19(A) Yuquan Road, Shijingshan District, Beijing, 100049, China

11 <sup>2</sup>School of Psychological and Cognitive Sciences, Peking University, No. 52, Haidian  
12 Road, Haidian District, Beijing 100805, China

13 <sup>3</sup>Division of Biomedical Science, Faculty of Medicine, University of Tsukuba, 1-1-1  
14 Tenno-dai, Tsukuba, Ibaraki 305-8577, Japan

15 <sup>4</sup>The Brain and Mind Institute, University of Western Ontario, London, Canada

16 <sup>5</sup>Department of Physiology and Pharmacology, University of Western Ontario,  
17 London, Canada

18 <sup>6</sup>Medical Sciences, University of Tsukuba, 1-1-1 Tenno-dai, Tsukuba, Ibaraki 305-  
19 8577, Japan

20 <sup>7</sup>Department of Functional Brain Imaging, National Institutes for Quantum Science  
21 and Technology, 4-9-1 Anagawa, Inage-ku, Chiba 263-8555 Japan

22 <sup>8</sup>IDG/McGovern Institute for Brain Research at Peking University, No. 52, Haidian  
23 Road, Haidian District, Beijing 100805, China

24 <sup>9</sup>Beijing Key Laboratory of Behavior and Mental Health, Peking University, No. 52,  
25 Haidian Road, Haidian District, Beijing 100805, China

26

27 †These authors contributed equally to this work.

28 \*Correspondence to: Hiroshi Yamada, Ph.D.: Division of Biomedical Science, Faculty

29 of Medicine, University of Tsukuba 1-1-1 Tennodai, Tsukuba, Ibaraki, 305-8577

30 Japan. Tel/Fax: 81-29-853-6013; e-mail: h-yamada@md.tsukuba.ac.jp

31

32 **Abstract**

33 Neural population dynamics, presumably fundamental computational units in the  
34 brain, provide a key framework for understanding information processing in the  
35 sensory, cognitive, and motor functions. However, neural population dynamics is not  
36 explicitly related to the conventional analytic framework for single-neuron activity, i.e.,  
37 representational models that analyze neuronal modulations associated with cognitive  
38 and motor parameters. In this study, we applied a recently developed state-space  
39 analysis to incorporate the representational models into the dynamic model in  
40 combination with these parameters. We compared neural population dynamics  
41 between continuous and categorical task parameters during two visual recognition  
42 tasks, using the datasets originally designed for a single-neuron approach. We  
43 successfully extracted neural population dynamics in the regression subspace, which  
44 represent modulation dynamics for both continuous and categorical task parameters  
45 with reasonable temporal characteristics. Furthermore, we combined the classical  
46 optimal-stimulus analysis paradigm for the single-neuron approach (i.e., stimulus  
47 identified as maximum neural responses) into the dynamic model, and found that the  
48 most prominent modulation dynamics at the lower dimension were derived from  
49 these optimal responses. Thus, our approach provides a unified framework for  
50 incorporating knowledge acquired with the single-neuron approach into the dynamic  
51 model as a standard procedure for describing neural modulation dynamics in the  
52 brain.

53

54 **Keywords:** monkey, neural population dynamics, regression subspace, orbitofrontal  
55 cortex, hippocampus

56

## 57 **Introduction**

58 Recent innovations in the state-space analysis applied to multi-neuronal activities  
59 provide insight into the dynamic structure of information processing in a neural  
60 population (Brendel et al., 2011; Churchland et al., 2012; Mante et al., 2013). The  
61 identified dynamic structures of neural population activity are known as neural  
62 population dynamics and are assumed to reflect some underlying computations  
63 occurring in a neural network in the sensory, cognitive, and motor domains (Aoi et al.,  
64 2020; Churchland et al., 2012; Murray et al., 2017; Okazawa et al., 2021; Osako et  
65 al., 2021; Raposo et al., 2014; Rossi-Pool et al., 2021). In the state-space analysis,  
66 multi-neuronal interactions with fine temporal evolution have provided a different  
67 perspective from the conventional analytical framework for single-neuron activity,  
68 known as the representational model. In this conventional framework, the neuronal  
69 discharge rate of a single neuron is assumed to reflect some mathematical  
70 parameters presumably computed in a neural circuit, such as the Gabor function in  
71 the visual cortices (Jones & Palmer, 1987; Tolhurst & Movshon, 1975), movement  
72 direction (Georgopoulos et al., 1982) and muscle force (Fetz & Cheney, 1980) in the  
73 motor cortices, reward value in the parietal cortex (Platt & Glimcher, 1999), and the  
74 location of animals during navigation in the hippocampus (O'Keefe & Dostrovsky,  
75 1971). As dynamic and representational models have rarely been analyzed  
76 simultaneously, a fundamental question remains as to how these two different  
77 approaches reflect putatively different or shared aspects of neural computation  
78 employed by each neuron and the underlying neuronal network, as well as their  
79 relationship.

80 Theoretical neuroscience has provided a quantitative basis for the computation  
81 of single neurons in the brain (Dayan & Abbott, 2001). The theory has been  
82 developed in parallel with the development of measurement technology for neuronal  
83 activity (Yuste, 2015). The early representative model was developed when

84 researchers observed only one neuron while animals performed a behavioral task or  
85 were under anesthesia. As the single-neuron recording technique provides fine  
86 neuronal activity *in vivo* (Evarts, 1968; Hubel & Wiesel, 1959; Mountcastle &  
87 Henneman, 1949; Wurtz, 1968), an analytical and theoretical framework was  
88 developed to describe the functional role of separately recorded single-neuron  
89 activity. Recently, large-scale multi-channel recording technology has been  
90 developed to measure a large number of isolated neurons (Buzsaki et al., 2015; Jun  
91 et al., 2017) never imagined before. These simultaneously recorded single-neuron  
92 activities in the tens of thousands motivated computational neuroscientists to pursue  
93 a theoretical framework for neural computations that provides a different perspective  
94 from the conventional representational model (Aoi & Pillow, 2018; Elsayed &  
95 Cunningham, 2017; Keemink & Machens, 2019; Saxena & Cunningham, 2019; Vyas  
96 et al., 2020).

97 Neural population dynamics, derived through dimensional reduction of neural  
98 population activity and its projection onto parsimonious dimensions, describe the  
99 temporal structures of neural response in fine time resolutions in the order of  
100 approximately 10 ms, different from other conventional population analyses, e.g.,  
101 (Georgopoulos et al., 1982). Both analytic frameworks have described brain function  
102 in various functional domains, but the relationship between the developing dynamic  
103 model and the conventional representational model remains unclear. Indeed, we do  
104 not really know whether and how the neural population described by the conventional  
105 representational model is described from a dynamic-system perspective. Thus, it is  
106 challenging to incorporate knowledge acquired from the representational model into  
107 the dynamic model in the form of neural population dynamics.

108 We previously developed a variant of state-space analysis for continuous  
109 parameters (Yamada et al., 2021), which describes how neurons dynamically encode  
110 some cognitive parameters in the regression subspace at the population level.

111 Although the pseudo-population of neurons was composed of non-simultaneously  
112 recorded single-neuron activity according to the representational framework, our  
113 previous study successfully described neural modulation dynamics using continuous  
114 parameters related to value-based decision making. Nevertheless, the other standard  
115 parameter for single-neuron recordings, categorical, was not incorporated previously,  
116 and thus, our previous analysis were not able to describe all types neural  
117 modulations in a dynamic system perspective. Here, we applied our analysis to the  
118 pre-existing datasets using a typical factorial design for conventional single-neuron  
119 recordings, i.e., categorical task parameters, from the hippocampus in monkeys  
120 performing a memory retrieval task (H. Chen & Naya, 2020). Our approach provided  
121 the temporal structure of neural modulations for both types of task parameters  
122 moment-by-moment, which would not be possible with the representational model,  
123 while most aspects of neural modulation were dynamically described, consistent with  
124 the conventional representational model. Thus, our analytic approach is beneficial to  
125 analyze neural modulation dynamics for all types of pre-existing data allowing  
126 researchers to incorporate the representational model into a dynamic system.

127

## 128 **Results**

### 129 **Task, monkey's behavior and datasets**

130 Details of the behavioral training, learning progress, and behavioral performance of  
131 the animals in the cued lottery task (Exp. 1, Yamada et al., 2021) and in the item-  
132 location-retention (ILR) task (Exp. 2, Chen & Naya, 2020) have been previously  
133 reported. Briefly, after completing training in Exp. 1, the monkeys learned to estimate  
134 the expected value of the lottery, defined as a multiplicative combination of  
135 probability and magnitude, and chose the option with higher expected values  
136 (Yamada et al., 2021). This choice behavior was observed separately from the neural  
137 recordings. We used the neural activity recorded from the central par of the

138 orbitofrontal cortex (cOFC) in the non-choice condition where a single lottery cue and  
139 its outcome were provided to the monkeys (Figure 1A–C). In Exp. 2, the monkeys  
140 learned to retain the types of visual items and their presented location during the  
141 encoding phase, after which the monkeys indicated whether the sample item was  
142 matched to the cued items by choosing the memorized location (Figure 1D). Six  
143 visual items and four locations were used (Figure 1E). We used the neural activity  
144 recorded from the HPC (Figure 1F), after which the sample stimulus was presented  
145 to the monkeys during the encoding phase.

146 In this study, we constructed two pseudo-simultaneously recorded populations of  
147 neurons by aligning the single-neuron activity of the cOFC (Figure 1C, 190 neurons)  
148 and HPC (Figure 1F, 590 neurons) with respect to the lottery cue onset in the single-  
149 cue task (Figure 1A, gray bar) and the sample onset in the ILR task, respectively  
150 (Figure 1D, gray bar), with a 0.6-s time window for each. Note that the HPC  
151 population data in Exp. 2 has been analyzed and reported using a representational  
152 model, but never analyzed using a dynamic model. Note also that the cOFC  
153 population data in Exp. 1 has been analyzed using both representational and  
154 dynamic models, and here, we repeated the same analysis with the shorter analysis  
155 time window after the cue presentation (2.7 s time window was used in Yamada et al.,  
156 2021).

157

### 158 **Conventional analyses for detecting task-dependent modulations**

159 We first applied common conventional analyses such as the general linear model:  
160 linear regression in Exp. 1 and ANOVA in Exp. 2, respectively (see Methods).  
161 Detailed results from these conventional analyses have been previously reported  
162 (Figure 2E–O in Yamada et al., 2021, Figures 2 and 5 in Chen et al., 2020). In Exp. 1,  
163 the linear regression analysis showed that the cOFC neurons encode both probability  
164 and magnitude to some extent after cue onset, as shown in an example neuron

165 (Figure 2A–B,  $n = 119$  trials, coefficient: intercept,  $-0.74$ ,  $t = -0.72$ ,  $P = 0.47$ ;  
166 probability,  $8.55$ ,  $t = 6.91$ ,  $P < 0.001$ ; magnitude,  $11.1$ ,  $t = 8.95$ ,  $P < 0.001$ ). This  
167 conventional analysis showed whether the probability and magnitude cued by the  
168 lottery, both continuous parameters, modulated neuronal activity in each neuron. In  
169 the cOFC populations, approximately half of the neurons were modulated by the  
170 probability and magnitude of rewards during the 1-s time window (0-1 s after cue  
171 onset, probability: 44%, 84/190, magnitude: 49%, 94/190). The analysis with 0.02-s  
172 time bins, used to analyze neural population dynamics latter, showed that the  
173 percentages of neurons modulated by these two parameters increased and then  
174 decreased during the 1.0 s after the onset of the lottery cue (Figure 2C).

175 In Exp. 2, ANOVA showed that the HPC neurons could encode both types of  
176 items and their presented locations to some extent, as shown in an example neuron  
177 (Figure 2D–E, two-way ANOVA,  $n = 240$  trials, item:  $F_{(5,216)} = 79.50$ ,  $P < 0.001$ ,  
178 location:  $F_{(3,216)} = 5.48$ ,  $P = 0.001$ ). The analysis showed whether the items and  
179 locations, both categorical parameters, modulated neuronal activity in each neuron.  
180 In the HPC population, considerable proportions of neurons were modulated by these  
181 two factors (0.08–1 s after sample onset, Item, 26%, 152/590, Position, 22%,  
182 131/590). These proportions were significantly smaller than those of the cOFC  
183 neurons modulated by the probability and magnitude in Exp. 1 (Chi-squared test,  $df$   
184  $=1$ ,  $P < 0.001$  for all cases). In the 0.02-s time bins, the percentages of neurons  
185 modulated by these two factors increased and then decreased during the 1.0 s after  
186 the onset of the sample stimulus (Figure 2F).

187 In short, the general linear model detected neural modulations using continuous  
188 and categorical parameters, which are usually used in the standard representational  
189 model, but these analyses did not clearly provide temporal structure of neural  
190 population signals.

191



192 **State-space analysis for detecting neural modulation dynamics at the**  
193 **population level**

194 State-space analysis originally provided temporal dynamics of neural population  
195 signals related to cognitive and motor performances for whole neural activity changes  
196 under an assumption of linear system (Churchland et al., 2012; Mante et al., 2013).  
197 We previously developed a variant of the state-space analysis, which extracts the  
198 temporal structure of neural modulation by the task-related continuous parameters,  
199 probability and magnitude of rewards (Yamada et al., 2021). Here, we extend this  
200 analysis to neural modulations by categorical parameters to describe how the HPC  
201 neural population reflects item and location dynamically. We represented each  
202 neural-population signal as a vector time series in the parsimonious dimensions in  
203 two steps (Figure 3). First, we used a general linear model to project a time series of  
204 each neural activity into a regression subspace composed of task parameters as  
205 continuous (Figure 3A) and categorical (Figure 3B) (see Methods for details). This  
206 step captures the across-trial variance caused by the task-related parameters  
207 moment-by-moment at the population level. Note that this step requires an  
208 orthogonal matrix for task parameters because the estimation of the regression  
209 subspace is distorted given that the estimation of the regression matrix assumes  
210 orthogonality between parameters. Second, we applied PCA once to the time series  
211 of neural activities in the regression subspace in each neural population. This step  
212 determined the main feature of the neural population signal moment-by-moment in  
213 the predominant dimensions at the population level. Because neural activations are  
214 dynamic over time, this analysis identified whether and how signal modulations occur  
215 as a time-series of eigenvectors. These extracted time series of eigenvectors  
216 captured how the main neural modulation evolved as a vector angle and size, and  
217 their deviance at the population level (Figure 3C).

218 We evaluated the eigenvector properties in the first three principal components  
219 (PC1 to PC3) in each neural population in terms of vector angle, size, and deviance.  
220 We compared two neural populations recorded during two different cognitive tasks in  
221 terms of these vector properties.

222

### 223 **Neural population dynamics reflecting continuous and categorical parameters**

224 Our state-space analysis described the neural population dynamics in the cOFC  
225 (Figure 4A–C) during the perception of visual lotteries. In our previous study, we  
226 reported neural population dynamics during whole a cue period of 2.7 s (Yamada et  
227 al., 2021), but here, we analyzed the dynamics only during the initial 0.6 s to ensure  
228 that the neural population structures would be comparable between the cOFC and  
229 HPC populations with continuous and categorical parameters. We first confirmed the  
230 performance of the state-space analysis indicated by the percentages of variance  
231 explained in the cOFC population (Figure 4A). The cOFC population exhibited high  
232 performance, more than 40% of the variance was explained by PC1 and PC2 (see  
233 gray arrowhead). This is consistent with our previous findings (Figure 7A in Yamada  
234 et al., 2021, 27% in 0.02s bin during 2.7 s). We then characterized the whole  
235 structure of the cOFC population by plotting its eigenvectors moment-by-moment  
236 with the temporal order. As shown in Figure 4B, the eigenvectors for PC1 and PC2  
237 evolved less than 0.2 s after the onset of the cues in both probability and magnitude,  
238 while the eigenvectors shortened after approximately 0.3 s. These changes in  
239 eigenvectors were very stable in terms of vector angle (Figure 4C, top), as seen in  
240 the vector evolutions at 45° in angle between the PC1 and PC2 plane (see also  
241 Figure 7B in Yamada et al., 2021), while the vectors changed in PC3 in the opposite  
242 direction from positive to negative over time (Figure 4B and Figure 4C, bottom). Thus,  
243 these stable structures in the top two dimensions are consistent with our previous  
244 ones, even when the analysis window sizes differed.

245        Upon analysis of the HPC population as modulated by the two categorical  
246 parameters, the performance of the analysis was lower than that in Exp. 1 (Figure  
247 5A). The first two PCs only explained approximately 10% of the variance (see gray  
248 arrowhead) possibly because the percentages of modulated neurons in the recorded  
249 HPC population were not high compared to the cOFC populations (Figure 2C and F).  
250 This might also be partly because of the larger data matrix composed of 10 vectors at  
251 each time point (six items and four locations) and a larger neural population  
252 containing 590 neurons: total  $X$  of size  $N_{(590)} \times M_{(300)}$  because in our previous study,  
253 PCA performance decreased as the matrix size increased (Figure 7A in Yamada et  
254 al., 2021). We evaluate the effect of matrix size on PCA performance later in the  
255 manuscript (Figure 9). The eigenvectors in the first three PCs appeared to describe  
256 the neural population dynamics in the HPC. For example, the extracted eigenvectors  
257 for each visual item evolved within a reasonable range of time; increase and then  
258 decreased during approximately 0.2 to 0.5 s (Figure 5B), consistent with our previous  
259 findings using typical conventional analysis (Figures. 2 and 3 in Chen and Naya,  
260 2020). In clear contrast, the eigenvectors for locations did not show clear trends over  
261 time (Figure 5C), as the location information was shown to the monkeys before the  
262 sample presentations. When plotting the eigenvectors in the space of the first three  
263 PCs, the eigenvectors consistently evolved in one direction in the spaces of PC1 and  
264 PC2 (I2, I3, and I6) or in PC3 (I1, I4, and I5) (Figure 5D, left). In contrast, the  
265 eigenvectors for the locations were positioned at a constant location across time  
266 (Figure 5D, right). Unambiguously, arrangements of the eigenvectors for items and  
267 locations were orthogonalized, as seen in the item representations in the second and  
268 fourth quadrants and location representations in the first and third quadrants (Figure  
269 5D, top row). Thus, our state-space analysis in the regression subspace successfully  
270 described neural modulation dynamics in the HPC populations similar to the cOFC

271 populations, while they reflect continuous and categorical parameters in their neural  
272 modulations.

273

#### 274 **Effect of shuffle control on PCA performance**

275 To validate the significance of these findings, we used a shuffle control procedure in  
276 three ways (see Methods for details), which determines the number of available  
277 dimensions in the neural population. In shuffled conditions 1 and 2, information on  
278 task-related parameters was partially shuffled in the regression subspace, matrix  $X$ .  
279 In shuffle condition 1, random permutation of neuron,  $n$ , was performed at each time  $i$ ,  
280 eliminating the temporal neural modulation structure by condition C across each  
281 neuron but retaining the effect of neural modulation at each time,  $i$ , at the population  
282 level. In shuffle condition 2, random permutation of time,  $i$ , was performed in each  
283 neuron,  $n$ , eliminating the temporal neural modulation structure by condition C in  
284 each neuron but retaining the effect of neural modulation in each neuron,  $n$ , at the  
285 population level. In shuffled condition 3, random permutation of both time  $i$  and  
286 neuron  $n$  was performed. We evaluated the performance of the PCAs for each  
287 condition of each experiment.

288 As shown in Figure 6, these three shuffle control procedures reproduced  
289 different disturbances in neural populations. In shuffle conditions 1 and 3 (Figure 6A,  
290 left and right), the explained variance decreased compared to those from the original  
291 data in the cOFC population. In shuffle condition 2, a considerable amount of  
292 variance was explained by PCA (Figure 6A, middle). These effects are consistent  
293 with those of our previous study (Figure 5A, E, and I in Yamada et al., 2021).  
294 Because the eigenvectors were very stable across time in the cOFC population  
295 (Figures 4B and 4C), the shuffle within each neuron did not strongly affect PCA  
296 performance (Figure 6A, middle). In contrast, the shuffle among neurons at each time  
297 point,  $t$ , strongly reduced the performance of PCA because neural modulation

298 differed neuron-by-neuron (Figure 6A, left). The same effects of shuffle controls were  
299 observed in the HPC population, for which categorical parameters were used (Figure  
300 6B); a considerable amount of variance was explained by PCA in shuffled condition 2.  
301 When examining the details of the decreased performance in each experiment, the  
302 performances of the first three PCs and the first twelve PCs were better than those in  
303 shuffled control condition 2 in Exp. 1 and Exp. 2, respectively ( $P < 0.05$  for all these  
304 cases). Thus, the total number of available dimensions differed between the  
305 experiments. Note that all three shuffles destroyed the structured neural population  
306 dynamics to some extent, consistent with our previous findings (Figure 5F and J in  
307 Yamada et al., 2021).

308

### 309 **Preference ordering in compatible with the representational model**

310 To incorporate the conventional analytic framework into neural population dynamics,  
311 we reconstruct the regression subspace in line with the conventional perspective,  
312 such as neural preference to task conditions, item and location in this case. We  
313 analyzed the most preferred to least preferred conditions for items and locations in  
314 each neuron, in which item and location were remapped to the most preferred to  
315 least preferred in each condition of item and location neuron-by-neuron, defined  
316 using whole activity in the 0.08–0.6 s analysis window in each neuron. Thus, the  
317 regression subspace became composed of the same size, total  $X$  of size  $N_{(590)} \times N_{(300)}$ ,  
318 but the condition,  $C$ , was changed to the most preferred to least preferred items and  
319 the most preferred to least preferred locations.

320 The percent variance explained by the model for PC1 and PC2 was almost the  
321 same in the preference-ordering analysis (Figure 7A, 11%) compared to the original  
322 analysis (Figure 5A, 10%). The composition of the eigenvectors was also similar  
323 between the analyses in the PC1 and PC2 dimensions, locating at the second and  
324 fourth quadrants from the most preferred ( $l_b$ , best item) to the least preferred ( $l_w$ ,

325 worst item), but they were clearly different in the PC3 dimension, as seen in the most  
326 preferred item (Ib) (Figure 7B, left bottom). The composition of eigenvectors for  
327 locations was not clearly changed by preference ordering, even for PC3 (Figure 7B,  
328 right bottom). Thus, preference ordering may affect the eigenvector compositions at  
329 higher dimensions, equal to or more than PC3.

330

### 331 **Quantitative analyses of neural population dynamics between two neural** 332 **populations**

333 To quantitatively examine these neural population structures, we compared the  
334 properties of the eigenvectors by estimating the vector size, angle, and deviance in  
335 each neural population (Figure 8). For this analysis, we used the rank-ordered HPC  
336 data shown in Figure 7, as well as the cOFC data shown in Figure 4. In the rank-  
337 ordered data, we evaluated the best and worst conditions as typically used in  
338 conventional representational analyses.

339 First, evaluation of vector size provided clear time-dependent structures in both  
340 cOFC and HPC populations for probability and magnitude (Figure 8A) and for the  
341 best and worst items (Figure 8B). Such time-dependent changes were not clearly  
342 observed in the eigenvectors for the best and worst locations (Figure 8B, right and  
343 second right columns), presumably because location information had already been  
344 provided to the monkeys before the samples appeared. The vector sizes during 0.1 s  
345 to 0.6 s after the onset of the lottery stimuli were not significantly different between  
346 two continuous parameters, probability and magnitude of rewards (Figure 8C,  
347 Wilcoxon rank sum test; PC1-2,  $n = 52$ ,  $df = 51$ ,  $W = 330$ ,  $P = 0.892$ , PC2-3,  $n = 52$ ,  
348  $df = 51$ ,  $W = 341$ ,  $P = 0.964$ ), consistent with our previous findings (Yamada et al.,  
349 2021). In contrast, the vector sizes during 0.1 s to 0.6 s after the onset of the sample  
350 stimuli significantly differed between the best and worst items (Figure 8D, Wilcoxon  
351 signed rank test; PC1-2, item,  $n = 52$ ,  $df = 51$ ,  $W = 502$ ,  $P = 0.002$ , PC2-3, item,  $n =$

352 52,  $df = 51$ ,  $W = 588$ ,  $P < 0.001$ ; PC1-2, location,  $n = 52$ ,  $df = 51$ ,  $W = 600$ ,  $P < 0.001$ ,  
353 PC2-3, item,  $n = 52$ ,  $df = 51$ ,  $W = 542$ ,  $P < 0.001$ ), possibly because the regression  
354 coefficients for the best conditions were considerably different from their means  
355 because the HPC responses were highly selective for one object (Figure 2D–E).  
356 Thus, the vector sizes captured the temporal changes in neural modulation at the  
357 population level.

358 The analyses of vector angles showed that all eigenvectors were very stable in  
359 both populations in the top two dimensions (Figure 8E–F, top, Wilcoxon rank sum  
360 test; cOFC, PC1-2,  $n = 52$ ,  $df = 51$ ,  $W = 62$ ,  $P < 0.001$ ; HPC, PC1-2, item,  $n = 52$ ,  $df$   
361  $= 51$ ,  $W = 520$ ,  $P < 0.001$ , location,  $n = 52$ ,  $df = 51$ ,  $W = 0$ ,  $P < 0.001$ ), as also shown  
362 in Figures 4C top and 7B top. Their angles in the PC2-3 plane were not stable  
363 (Figure 8E–F, bottom, Wilcoxon rank sum test; cOFC, PC2-3,  $n = 52$ ,  $df = 51$ ,  $W =$   
364  $343$ ,  $P = 0.935$ ; HPC, PC2-3, item,  $n = 52$ ,  $df = 51$ ,  $W = 321$ ,  $P = 0.765$ , PC2-3,  
365 location,  $n = 52$ ,  $df = 51$ ,  $W = 312$ ,  $P = 0.643$ , see also, Figure 4C, bottom and Figure  
366 7B, bottom). Both neural populations showed considerable vector deviance smaller  
367 than 0.1 with some statistical differences (Figure 8G–H, Wilcoxon rank sum test;  
368 cOFC, PC1-2,  $n = 52$ ,  $df = 51$ ,  $W = 361$ ,  $P = 0.683$ ; PC2-3,  $n = 52$ ,  $df = 51$ ,  $W = 300$ ,  
369  $P = 0.496$ ; HPC, PC1-2, item,  $n = 52$ ,  $df = 51$ ,  $W = 459$ ,  $P = 0.027$ ; PC2-3, item,  $n =$   
370  $52$ ,  $df = 51$ ,  $W = 581$ ,  $P < 0.001$ , PC1-2, location,  $n = 52$ ,  $df = 51$ ,  $W = 352$ ,  $P = 0.807$ ;  
371 PC2-3, location,  $n = 52$ ,  $df = 51$ ,  $W = 384$ ,  $P = 0.408$ ). Thus, our state-space analysis  
372 in the regression subspace was capable of describing neural modulation dynamic in  
373 the cOFC and HPC during two different cognitive tasks composed of continuous and  
374 categorical parameters.

375

### 376 **Matrix size control for PCA**

377 Because the PCA performance was lower in the HPC than in the cOFC population,  
378 we evaluated the effect of matrix size on the representational models. In our previous

379 study, the variance explained by the PCA decreased as the matrix size increased to  
380 explain the same neural modulation (Figure 7A in Yamada et al., 2021). In the  
381 present study, we reduced the matrix size of the HPC population by extracting the  
382 best and worst conditions for item and location according to conventional  
383 representational model analysis, although the regression matrix from the other  
384 conditions, 2<sup>nd</sup> preferred to 5<sup>th</sup> preferred, were removed. The regression subspace  
385 was reduced from the large size, total  $X$  of size  $N_{(590)} \times N_{(10 \times 30)}$ , to  $N_{(590)} \times N_{(4 \times 30)}$ , similar  
386 column size to the OFC population,  $N_{(190)} \times N_{(2 \times 30)}$ , in terms of the number of conditions.  
387 In this smaller regression matrix, PCA performance improved (Figure 9A,  
388 approximately 16% of the variance explained by PC1 and PC2), consistent with the  
389 findings of our previous study where we used continuous parameters. The  
390 eigenvector compositions developed in a clearly symmetric way, perhaps because  
391 the variances from the other conditions were removed (Figure 9B). In this smaller  
392 regression matrix, the principal components appeared to be rotated at an  
393 approximately 135° angle from the original on the PC1-2 plane (Figures 9B and 7B).  
394 The percent variance explained by the PCA clearly differed from that in the shuffled  
395 conditions for the top three PCs, while the top six PCs significantly differed from  
396 shuffled control in condition 2 (Figure 9C, see also Figure 6B, middle), indicating that  
397 some neural population structures in higher dimensions were removed in this smaller  
398 matrix.

399 In summary, our state-space analysis clearly described the neural modulation  
400 structures for both continuous and categorical task parameters. In both populations,  
401 using two standard task designs, we found stable evolutions of neural modulation  
402 structures in a relatively short period i.e., 0.6 s while the monkeys perceived visual  
403 items.

404

405 **Discussion**



406 In our previous study, we developed a variant of state-space analysis in the  
407 regression subspace for continuous task parameters, which extracts neural  
408 modulation dynamics at the population level. Here, we applied our state-space  
409 analysis in the regression subspace to categorical task parameters and successfully  
410 described the neural modulation dynamics for items and locations for the first time  
411 (Figure 7). Comparisons of these results with those derived from continuous task  
412 parameters (Figures 4 and 5) indicated that our analysis showed gradual  
413 development (Figure 8A–B) and stable composition of the neural population  
414 structures at different angles (Figure 8E–F, top). Moreover, the population analysis  
415 using the best and worst conditions for items and locations showed that low-  
416 dimensional robust neural-modulation structures existed in this restricted neural  
417 population, and some high-dimensional information seemed to disappear by  
418 removing neural activity between the best and worst conditions (Figure 9A, and  
419 Figures 7B vs 9B). Although both the cOFC and HPC neural populations were  
420 pseudo-populations of neurons using repetitive single-neuron recordings for the  
421 representational models, we successfully extracted both neural modulation dynamics  
422 with the state-space analysis we developed. Our reliable extraction of neural  
423 modulation dynamics indicated that any type of data can be re-analyzed and  
424 evaluated to describe the temporal structure of neural modulations as dynamic  
425 representational models.

426

### 427 **Two different types of task parameters yield comparable regression subspaces**

428 In our state-space analysis, neural population activity was projected to the regression  
429 subspace, reflecting the across-trial variance caused by the task-related parameters  
430 at the population level. In this step, both continuous and categorical task parameters  
431 are reliably used within a framework in the general linear model. However, it was  
432 reliably performed with one critical limitation; the conditions in any parameters should

433 be orthogonalized as the experimental design (Grafen & Hails, 2002). In the linear  
434 system assumed here, the concept of orthogonality is critical in terms of statistics and  
435 to avoid the skewed projection of neural activity into the regression subspace, which  
436 is part of the whole neural activity reflecting activity modulation by the task  
437 parameters of interest.

438 Analysis of the regression subspace has been performed in a limited number of  
439 studies (Aoi et al., 2020; Mante et al., 2013). These studies aimed at detecting the  
440 regression subspace within a whole neural structure at a constant time point (Mante  
441 et al., 2013), and the detected modulation axis is assumed to be projected  
442 orthogonally and sometimes being stable through a task trial (Aoi et al., 2020). Our  
443 results support these assumptions, which were not examined in the previous study,  
444 as the cOFC and HPC showed stable evolution of these neural-modulation structures,  
445 at least during the two cognitive tasks with continuous and categorical task  
446 parameters. Thus, our approach encourages research that combines the  
447 conventional representational model and the dynamic model by re-analyzing the  
448 pseudo-population of recorded single-neuron activity to remap the dynamic neural  
449 modulation structures for all pre-existing data.

450

#### 451 **Stable and fluctuating signals in neural modulation dynamics**

452 In this study, we observed stable neural modulation dynamics in both the cOFC and  
453 HPC populations. Although these tasks were designed with different types of task  
454 parameters, both brain regions showed stable modulation structures during the visual  
455 perception (Figures 4, 7, and 8). Why do these two distinct brain regions show stable  
456 modulation dynamics? One possibility is that both the cOFC and HPC play a role in  
457 accessing the memory for the expected values as a combination of probability and  
458 magnitude in Exp. 1 and the association between stimulus and position for future  
459 decisions in Exp. 2. These types of stable structures were observed in the

460 dorsolateral prefrontal cortex during a typical working memory task (Murray et al.,  
461 2017). Thus, a key aspect of stable neural dynamics may be continuous access to  
462 memory and its maintenance.

463 In our previous study, fluctuating neural population signals were observed in the  
464 dorsal part of the striatum (DS) and medial part of the orbitofrontal cortex (mOFC)  
465 because of signal instability or weakness (Figure 5A and B in Yamada et al., 2021).  
466 Because the signal carried by the mOFC population was weak (Figure 8 bottom row  
467 in Yamada et al., 2021), the eigenvector fluctuation in the mOFC population reflected  
468 weak signal modulations by the probability and magnitude of rewards. In this case,  
469 moment-by-moment vector fluctuation was observed, as there was no clear neural  
470 modulation structure in the mOFC populations. In contrast, the fluctuating DS signal  
471 seemed to reflect the functional role employed by the DS neural population in  
472 detecting and integrating the probability and magnitude of rewards, related to the  
473 control of some actions (Balleine et al., 2007). In the DS population, structural  
474 changes in eigenvectors occurred over time (Figure 8 in Yamada et al., 2021). We  
475 need to elaborate on the stability of modulation dynamic functions in neural  
476 processing in future studies to elucidate how neural circuitry actually operates and  
477 computes (Ebitz & Hayden, 2021; Humphries, 2021).

478

## 479 **Conclusions**

480 Representational models have provided mounting evidence that neural modulation is  
481 associated with mathematical functions in every area of the brain. A dynamic-model  
482 approach that has been recently developed appears promising to account for  
483 different aspects of neural computation, but the relationship with the representational  
484 models remains unclear. Although a few studies have sought a connection between  
485 these two advances (X. Chen & Stuphorn, 2015; Churchland et al., 2012; Murray et  
486 al., 2017), more direct comparisons are necessary to understand the functional

487 significance of the neural population dynamics. Our results indicated that the neural  
488 modulation dynamics observed in population ensemble activities are compatible with  
489 representational models and encourage research aimed at incorporating traditional  
490 representational models into the dynamic system.

491

## 492 **Materials and Methods**

### 493 ***Subjects and experimental procedures***

494 Four macaque monkeys were employed for this study in two experiments  
495 (Experiment 1: *Macaca mulatta*, SUN, 7.1 kg, male; *Macaca fuscata*, FU, 6.7 kg,  
496 female; Experiment 2: *Macaca mulatta*, A, 9.3 kg, male; *Macaca mulatta*, D, 9.5 kg,  
497 male). All experimental procedures were approved by the Animal Care and Use  
498 Committee of the University of Tsukuba (Exp. 1, protocol no H30.336), and the  
499 Institutional Animal Care and Use of Laboratory Animals approved by Peking  
500 University (Exp. 2, project number Psych-YujiNaya-1) and performed in compliance  
501 with the US Public Health Service's Guide for the Care and Use of Laboratory  
502 Animals.

503

### 504 ***Behavioral task and Monkey electrophysiology***

#### 505 *Experiment 1*

506 *Cued lottery tasks.* Animals performed one of two visually cued lottery tasks: a  
507 *single-cue task* or a *choice task*. Neuronal activity was recorded only during the  
508 single-cue task.

509 At the beginning of trials during the single-cue task, the monkeys had 2 s to align  
510 their gaze to within  $3^\circ$  of a  $1^\circ$ -diameter gray central fixation target. After fixation for 1 s,  
511 a pie chart was presented for 2.5 s to provide information regarding the probability  
512 and magnitude of rewards at the same location as the central fixation target. The  
513 probability and magnitude of rewards were associated with the number of blue and

514 green 8° segments, ranging from 0.1 to 1.0 mL in 0.1-mL increments for magnitude  
515 and 0.1 to 1.0 in 0.1 increments for probability. With an interval of 0.2 s after the  
516 removal of the pie chart, either a 1 kHz or 0.1 kHz tone of 0.15-s duration was  
517 provided to indicate reward or no-reward outcomes, respectively. With an interval of  
518 0.2 s after the high tone, a fluid reward was delivered. After a low tone, no reward  
519 was delivered. An inter-trial interval of 4–6 s followed each trial.

520 In the trials during choice task, the animals were instructed to choose between  
521 two peripheral pie charts providing information regarding the probability and  
522 magnitude of rewards for each of the two target options were presented for 2.5 s, at  
523 8° to the left and right of the central fixation location. The animals received a fluid  
524 reward, indicated by the green pie chart of the chosen target, with the probability  
525 indicated by the blue pie chart; otherwise, no reward was delivered.

526 One hundred pie charts were used in the experiments. In the single-cue task,  
527 each pie chart was presented once in a random order. In the choice task, two pie  
528 charts from the 100 pie charts were randomly allocated to the two options. During  
529 one session of electrophysiological recording, approximately 30 to 60 trial blocks of  
530 the choice task were interleaved with 100 to 120 trial blocks of the single-cue task.

531 We used conventional techniques for recording single-neuron activity from the  
532 central part of the orbitofrontal cortex (cOFC, area 13M). A tungsten microelectrode  
533 (1–3 MΩ, FHC) was used to record single-neuron activity. Electrophysiological  
534 signals were amplified, band-pass filtered (at 50–3000 Hz), and monitored. Single-  
535 neuron activity was isolated based on the spike waveforms. We recorded from the  
536 cOFC of a single hemisphere in each of the two monkeys: 190 cOFC neurons (98,  
537 SUN and 92, FU). The activity of all single neurons was sampled when the activity of  
538 an isolated neuron demonstrated a good signal-to-noise ratio (>2.5). Blinding was not  
539 performed. The sample sizes required to detect effect sizes (number of recorded  
540 neurons, number of recorded trials in a single neuron, and number of monkeys) were

541 estimated based on previous studies (X. Chen & Stuphorn, 2015; Yamada et al.,  
542 2013; Yamada et al., 2018). Neural activity was recorded during 100–120 trials of the  
543 single-cue task. Neural activity was not recorded during the choice trials. In this study,  
544 we analyzed the cOFC activity data during 600 ms after cue onset from Yamada et al.  
545 (2021) for comparison with the activity data in Exp. 2.

546

#### 547 *Experiment 2*

548 *Item location-retention (ILR) task.* The animals performed the task under dim light in  
549 an electromagnetically shielded room. The task started with an encoding phase,  
550 which was initiated by the animal pulling a lever and fixating on a white square (0.6°  
551 presented within one of the four quadrants at 12.5° (monkey A) or 10° (monkey D)  
552 from the center of the touch screen (3M™ MicroTouch™ Display M1700SS, 17 inch),  
553 situated approximately 28 cm from the subjects. Eye position was monitored using an  
554 infrared digital camera with a sampling frequency of 120 Hz (ETL-200, ISCAN). After  
555 fixation for 0.6 s, one of the six items (3.0° for monkey A and 2.5° for monkey D,  
556 radius) was presented in the same quadrant as a sample stimulus for 0.3 s, followed  
557 by another 0.7-s fixation on the white square. If the fixation was successfully  
558 maintained (typically, < 2.5 °), the encoding phase ended with the presentation of a  
559 single drop of water.

560 The encoding phase was followed by a blank interphase delay interval of 0.7–1.4  
561 s during which no fixation was required. The response phase was initiated with a  
562 fixation dot presented at the center of the screen. One of six items was then  
563 presented at the center for 0.3 s as a cue stimulus. After another 0.5-s delay period,  
564 five disks were presented as choices, including a blue disk in each quadrant and a  
565 green disk at the center. When the cue stimulus was the same as the sample  
566 stimulus, the animal was required to choose by touching the blue disk in the same  
567 quadrant as the sample (i.e., match condition). Otherwise, the subject was required

568 to choose the green disk (i.e., non-match condition). If the animal made a correct  
569 choice, four to eight drops of water were provided as a reward; otherwise, an  
570 additional 4 s was added to the standard intertrial interval (1.5–3 s). During the trial, a  
571 large gray square (48° on each side, Red, Green, Blue value: 50, 50, 50, luminance:  
572 3.36 cd/m<sup>2</sup>) was presented at the center of the display (backlight luminance: 0.22  
573 cd/m<sup>2</sup>) as a background. After the end of the trial, all stimuli disappeared, and the  
574 entire screen displayed a light red color during the intertrial interval. The start of a  
575 new trial was indicated by the reappearance of the large gray square on the display,  
576 upon which the monkey could start pulling the lever, triggering the appearance of a  
577 white fixation dot. In the match condition, sample stimuli were pseudo-randomly  
578 chosen from six well-learned visual items, and each item was presented pseudo-  
579 randomly within the four quadrants, resulting in 24 (6 × 4) configuration patterns. In  
580 the nonmatch condition, the location of the sample stimulus was randomly chosen  
581 from the four quadrants, and the cue stimulus was randomly chosen from the five  
582 items that differed from the sample stimulus. The match and non-match conditions  
583 were randomly presented at a ratio of 4:1, resulting in 30 (24 + 6) configuration  
584 patterns. The same six stimuli were used during all recording sessions.

585 To record single-unit activity, we used a 16-channel vector array microprobe (V1  
586 X 16-Edge, NeuroNexus), a 16-channel U-Probe (Plexon), a tungsten tetrode probe  
587 (Thomas RECORDING), or a single-wire tungsten microelectrode (Alpha Omega).  
588 We recorded 590 hippocampal (HPC) neurons, of which the recording sites appeared  
589 to cover all its subdivisions (i.e., dentate gyrus, CA3, CA1, and subicular complex).  
590 We applied state-space analysis to the HPC population and compared to the results  
591 from the cOFC population.

592

593 ***Statistical analysis***

594 For statistical analysis, we used the statistical software package R (Exp. 1) and  
595 MATLAB (MathWorks) (Exp. 2). All statistical tests for the neural analyses were two  
596 tailed.

597

### 598 ***Behavioral analysis***

599 Exp. 1. We previously reported that monkey behavior depends on the expected  
600 values defined as probability time magnitude (Yamada et al 2021).

601 Exp. 2. We previously reported that two monkeys learned to retain the item and  
602 location information of the sample stimulus (H. Chen & Naya, 2020).

603 No new behavioral results were included in this study.

604

### 605 ***Neural analysis***

606 Peristimulus time histograms were drawn for each single-neuron activity aligned at  
607 the visual stimulus onset. The average activity curves were smoothed for visual  
608 inspection using a Gaussian kernel.

609

### 610 ***Conventional analyses to detect neural modulations in each neuron***

611 We analyzed neural activity during the 1-s time window (0-1 s after cue onset, Exp.  
612 1) and during the 0.92 s time window (0.08-1 s after sample onset, Exp. 2),  
613 respectively, respectively. These activities were used for the conventional analyses  
614 below. No Gaussian kernel was used.

615 *Exp. 1.* Neural discharge rates ( $F$ ) were fitted using a linear combination of the  
616 following parameters:

$$617 \quad F = b_0 + b_p \text{Probability} + b_m \text{Magnitude} \quad (1)$$

618 where Probability and Magnitude are the probability and magnitude of the rewards  
619 indicated by the pie chart, respectively.  $b_0$  is the intercept. If  $b_p$  and  $b_m$  were not 0 at  $P$



620 < 0.05, the discharge rates were regarded as being significantly modulated by that  
621 variable. These results have been previously reported (Yamada et al., 2021).

622 Based on the linear regression, activity modulation patterns were categorized  
623 into several types: “Probability” type with a significant  $b_p$  and without a significant  $b_m$ ;  
624 “Magnitude” type without a significant  $b_p$  and with a significant  $b_m$ ; “Both” type with  
625 significant  $b_p$  and  $b_m$ .

626 *Exp. 2.* For neural responses during the encoding phase after the sample  
627 presentation, we evaluated the effects of “item” and “location” for each neuron using  
628 two-way analysis of variance (ANOVA) ( $P < 0.01$  for each). We analyzed neurons  
629 that we tested in at least 60 trials (10 trials for each stimulus, 15 trials for each  
630 location). On average, we tested 100 trials for each neuron ( $n = 590$ ). The results  
631 have been previously reported (H. Chen & Naya, 2020).

632 Based on the ANOVA, activity modulation patterns were categorized into several  
633 types: “Item” type only with a significant main effect of Item; “Location” type only with  
634 a significant effect of Location; “Both” type with a significant effect of Item and  
635 Location or with a significant effect of interaction.

636

### 637 ***Population dynamics using principal component analysis***

638 We analyzed neural activity during a 0.6 s time period from cue onset (Exp. 1) and  
639 sample onset (Exp. 2). To obtain a time series of neural firing rates within this period,  
640 we estimated the firing rates of each neuron for every 0.02-s time bin (without  
641 overlap) during the 0.6-s period. No Gaussian kernel was used.

642

643 *Regression subspace.* We used a general linear model to determine the probability  
644 and magnitude of rewards (Exp. 1) and item and location (Exp. 2) affecting the  
645 activity of each neuron in the neural populations. Each neural population was  
646 composed of all recorded neurons in each brain region.

647 *Exp. 1.* We first set the probability and magnitude at 0.1 and 1.0 and 0.1 to 1.0 mL,  
648 respectively. We then described the average firing rates of neuron  $i$  at time  $t$  as a  
649 linear combination of the probability and magnitude in each neural population:

$$650 \quad F_{(i,t,k)} = b_{0(i,t)} + b_{1(i,t)}\text{Probability}_{(k)} + b_{2(i,t)}\text{Magnitude}_{(k)} \quad (2)$$

651 where  $F_{(i,t,k)}$  is the average firing rate of neuron  $i$  at time  $t$  on trial  $k$ ,  $\text{Probability}_{(k)}$  is the  
652 probability of reward cued to the monkey in trial  $k$ , and  $\text{Magnitude}_{(k)}$  is the magnitude  
653 of reward cued to the monkey in trial  $k$ . The regression coefficients  $b_{0(i,t)}$  to  $b_{2(i,t)}$   
654 describe the degree to which the firing rates of neuron  $i$  depend on the mean firing  
655 rates (hence, firing rates independent of task parameters), probability of rewards, and  
656 magnitude of rewards, respectively, at a given time  $t$  during the trials.

657 *Exp. 2.* We first set six items and four locations as categorical parameters. We then  
658 described the average firing rates of neuron  $i$  at time  $t$  as a linear combination of item  
659 and location in each neural population:

$$660 \quad F_{(i,t,k)} = b_{0(i,t)} + b_{1(i,t)}\text{Item}_{(k)} + b_{2(i,t)}\text{Location}_{(k)}, \quad (3)$$

661 where  $F_{(i,t,k)}$  is the average firing rate of neuron  $i$  at time  $t$  on trial  $k$ ,  $\text{Item}_{(k)}$  is the type  
662 of item cued to the monkey on trial  $k$ , and  $\text{Location}_{(k)}$  is the type of location cued to  
663 the monkey on trial  $k$ . Each of the regression coefficients  $b_{0(i,t)}$ ,  $b_{1(i,t)}$ , and  $b_{2(i,t)}$   
664 describe the degree to which the firing rates of neuron  $i$  depend on the mean firing  
665 rates (hence, firing rates independent of task parameters, probability, and magnitude  
666 of rewards), the degree of the firing rate in each item relative to the mean firing rates,  
667 and the degree of firing in each location relative to the mean firing rates, respectively,  
668 at a given time  $t$  during the trials. Note that the interaction term was not included in  
669 the model.

670 We used the regression coefficients (i.e., the regression table in the ANOVA)  
671 described in Eqs. 2 and 3 to identify how the dimensions of neural-population signals  
672 were composed of information related to probability and magnitude (Exp. 1) and were  
673 composed of information related to item and location (Exp. 2) as aggregated

674 properties of individual neural activity. This step constructs an encoding model where  
675 the regression coefficients could be explained by a temporal structure in the neural  
676 modulation of two continuous parameters (Exp. 1) or two categorical parameters  
677 (Exp. 2) at the population level. Our procedures are analogous to the state-space  
678 analysis performed by Mante et al. (Mante et al., 2013), in which the regression  
679 coefficients were used to provide an axis (or dimension) of the parameters of interest  
680 in multi-dimensional state space obtained through principal component analysis  
681 (PCA). In this study, our orthogonalized task design allowed us to reliably project the  
682 neural firing rates into the regression subspace. Note that our analyses were not  
683 aimed at describing the population dynamics of neural signals as a trajectory in multi-  
684 dimensional task space but were aimed at describing the neural-modulation  
685 dynamics as in a representational model.

686

687 *Preference ordering.* In Exp. 2, each neuron had a preferred item and location. As in  
688 the conventional representational-model analysis, we defined the preferred item and  
689 location in each neuron to construct matrix  $X$ . We constructed  $X$  with and without  
690 rank order. Items 1 to 6 were rank-ordered from the most preferred to least preferred,  
691 defined as the mean firing rates during a whole analysis time window from 0.08 to 0.6  
692 s. Thus,  $\text{Item}_{(k)}$  was the rank-ordered item cued to the monkey on trial  $k$ . In the same  
693 way as the definition of  $\text{Item}$ ,  $\text{Location}_{(k)}$  was the rank-ordered location cued to the  
694 monkey on trial  $k$ . Note that this preference ordering was never changed through  
695 time  $t$  in each neuron  $n$ .

696

697 *Principal Component Analysis* We used PCA to identify the dimensions of the neural-  
698 population signal in the orthogonal spaces composed of the probability and  
699 magnitude of rewards in Exp. 1 and of the item and location in Exp. 2, respectively, in  
700 each of the four neural populations. In each neural population, we first prepared a

701 two-dimensional data matrix  $X$  of size  $N_{(n)} \times M_{(C \times T)}$ ; the regression coefficient vectors,  
702  $b_{1(i,t)}$  and  $b_{2(i,t)}$ , in Eqs. 2 and 3, whose rows correspond to the total number of  
703 neurons ( $n$ ) in each neural population and columns correspond to  $C$ , the total number  
704 of conditions (i.e., two: probability and magnitude in Exp. 1; 10: six items and four  
705 locations in Exp. 2), and  $T$  as the total number of the analysis windows (i.e., 30 bins:  
706 0.6 s divided by the window size bin, 0.02 s). A series of eigenvectors was obtained  
707 by applying PCA once to data matrix  $X$  in each of the neural populations. The  
708 principal components (PCs of this data matrix are vectors  $v_{(a)}$  of length  $N_{(n)}$ , and the  
709 total number of recorded neurons if  $M_{(C \times T)}$  is  $> N_{(n)}$ ; otherwise, the length is  $M_{(C \times T)}$ .  
710 The PCs were indexed from the principal components, explaining most of the  
711 variance to the least variance. The eigenvectors were obtained using the `prcomp` ()  
712 function in R software. Note that we did not include the intercept term  $b_{0(i,t)}$  to focus on  
713 the neural modulation by the interested parameters.

714

715 *Eigenvectors.* When we applied PCA to data matrix  $X$ , we decomposed the matrix  
716 into eigenvectors and eigenvalues. Each eigenvector has a corresponding  
717 eigenvalue. In our analysis, the eigenvectors at time  $t$  represent a vector in the space  
718 of probability and magnitude in Exp. 1 and of item and location in Exp. 2, respectively.  
719 The eigenvalues at time  $t$  for the probability and magnitude in Exp. 1 and of item and  
720 location in Exp. 2, respectively, were scalars, indicating the extent of variance in the  
721 data in that vector. Thus, the first PC is the eigenvector with the highest eigenvalue.  
722 We mainly analyzed eigenvectors for the first three PCs (PC1 to PC3) in the following  
723 analyses, as the top three PCs had been analyzed previously (Okazawa et al., 2021).  
724 Note that we applied PCA once to each neural population, and thus, the total  
725 variances contained in the data differed among the neural populations.

726

727 *Analysis of eigenvectors.* We evaluated the characteristics of eigenvectors for PC1 to  
728 PC3 in each neural population in terms of the vector angle, size, and deviance in the  
729 space of probability and magnitude in Exp. 1 and of the item and location in Exp. 2,  
730 respectively. The angle is the vector angle from the horizontal axis from 0° to 360°  
731 against the main PCs. Size is the length of the eigenvector. The deviance is the  
732 difference between vectors. We estimated the deviance from the mean vector for  
733 each neural population. These three characteristics of the eigenvectors were  
734 compared in each population at  $P < 0.05$  using the Kruskal–Wallis and Wilcoxon  
735 rank-sum tests. The vector during the first 0.1 s was extracted from these analyses.

736

737 *Shuffle control for PCA.* We performed three shuffle controls to examine the  
738 significance of population structures described with PCA. A two-dimensional data  
739 matrix  $X$  was randomized by shuffling in three ways. In shuffled control 1, matrix  $X$   
740 was shuffled by permutating the allocation of neuron  $n$  at each time  $i$ . This shuffle  
741 provided a data matrix  $X$  of size  $N_{(n)} \times M_{(C \times T)}$ , eliminating the temporal structure of  
742 neural modulation by condition  $C$  in each neuron but retaining the neural modulations  
743 at time  $t$  at the population level. In shuffled control 2, matrix  $X$  was shuffled by  
744 permutating the allocation of time  $i$  in each neuron  $n$ . This shuffle provided a data  
745 matrix  $X$  of size  $N_{(neuron)} \times M_{(C \times T)}$ , eliminating the neural modulation structure under  
746 condition  $C$  maintained in each neuron but retaining the neural modulation in each  
747 neuron at the population level. In shuffled control 3, matrix  $X$  was shuffled by  
748 permutating the allocation of both time  $i$  and neuron  $n$ . In these three shuffle controls,  
749 matrix  $X$  was estimated 1,000 times. PCA performance was evaluated by  
750 constructing the distributions of explained variances for PC1 to PC12. The statistical  
751 significance of the variances explained by PC1 and PC3 was estimated based on the  
752 95th percentile of the reconstructed distributions of explained variance or bootstrap  
753 standard errors (i.e., standard deviation of the reconstructed distribution).

754

755 *Matrix Size Control for PCA* Because the original matrix sizes of  $X$ ,  $N_{(n)} \times M_{(C \times T)}$ , differed  
756 between the cOFC ( $X$  of size  $N_{(190)} \times M_{(2 \times 30)}$ ) and HPC ( $X$  of size  $N_{(590)} \times M_{(10 \times 30)}$ ) *populations*,  
757 we controlled for matrix size. In this control, we used only two columns in each bin, the most  
758 preferred and least preferred, for each condition  $C$ , item, and location; thus, matrix  $X$  was ( $X$   
759 of size  $N_{(590)} \times M_{(4 \times 30)}$ ). This corresponds to the conventional analysis usually used in the  
760 representational model, which compares the neural responses between the most preferred  
761 and least preferred conditions. We evaluated the percentage explained by the model between  
762 the original matrix and size-controlled matrix in the HPC.

763

#### 764 **Acknowledgments**

765 The authors would like to thank Takashi Kawai, Ryo Tajiri, Yoshiko Yabana, and Yuki  
766 Suwa for their technical assistance. The authors would like to thank Tomohiko Takei  
767 and Yasuhiro Tsubo for their discussions. Monkey FU was provided by NBRP  
768 "Japanese Monkeys" through the National Bio Resource Project of the MEXT, Japan.  
769 Funding: This research was supported by JSPS KAKENHI Grant Number  
770 JP:15H05374, 19H05007, 21H02797, Takeda Science Foundation, Research  
771 Foundation for the Electrotechnology of Chubu (H.Y.), The National Natural Science  
772 Foundation of China (Grant 31871139) (Y.N.).

773

774 **Conflict of interest:** The authors declare no competing of interests.

775 **Author Contributions:** H.Y. conceptualized the study. H.Y. and Y.N. designed the  
776 experiments. H.Y., H.C., Y.I., Y.H., and T.M. conducted the experiments. M.M.  
777 conducted a part of experiments. H.Y. developed the analytic tools. H.Y. and H.C.  
778 analyzed the data. H.Y., H.C., J.K., T.O., T.M., and Y.N. evaluated the results. H.Y.,  
779 H.C., J.K., T.O., and T.M. wrote the manuscript. All authors edited and approved the  
780 final manuscript.

781 **Data availability:** All data and analysis codes in this study are available from the

782 corresponding authors.

783

784 **References**

- 785 Aoi, M. C., Mante, V., & Pillow, J. W. (2020). Prefrontal cortex exhibits  
786 multidimensional dynamic encoding during decision-making. *Nat Neurosci*,  
787 23(11), 1410-1420. doi:10.1038/s41593-020-0696-5
- 788 Aoi, M. C., & Pillow, J. W. (2018). Model-based targeted dimensionality reduction  
789 for neuronal population data. *Adv Neural Inf Process Syst*, 31, 6690-6699.
- 790 Balleine, B. W., Delgado, M. R., & Hikosaka, O. (2007). The role of the dorsal  
791 striatum in reward and decision-making. *J Neurosci*, 27(31), 8161-8165.
- 792 Brendel, W., Romo, R., & Machens, C. K. (2011). Demixed Principal Component  
793 Analysis. *Advances in Neural Information Processing Systems*, 24, 2654-2622.
- 794 Buzsaki, G., Stark, E., Berenyi, A., Khodagholy, D., Kipke, D. R., Yoon, E., & Wise,  
795 K. D. (2015). Tools for probing local circuits: high-density silicon probes  
796 combined with optogenetics. *Neuron*, 86(1), 92-105.  
797 doi:10.1016/j.neuron.2015.01.028
- 798 Chen, H., & Naya, Y. (2020). Forward Processing of Object-Location Association  
799 from the Ventral Stream to Medial Temporal Lobe in Nonhuman Primates.  
800 *Cereb Cortex*, 30(3), 1260-1271. doi:10.1093/cercor/bhz164
- 801 Chen, X., & Stuphorn, V. (2015). Sequential selection of economic good and action in  
802 medial frontal cortex of macaques during value-based decisions. *Elife*, 4.  
803 doi:10.7554/eLife.09418
- 804 Churchland, M. M., Cunningham, J. P., Kaufman, M. T., Foster, J. D., Nuyujukian,  
805 P., Ryu, S. I., & Shenoy, K. V. (2012). Neural population dynamics during  
806 reaching. *Nature*, 487(7405), 51-56. doi:10.1038/nature11129
- 807 Dayan, P., & Abbott, L. (2001). *Theoretical neuroscience: computational and*  
808 *mathematical modeling of neural systems*.
- 809 Ebitz, R. B., & Hayden, B. Y. (2021). The population doctrine in cognitive  
810 neuroscience. *Neuron*, 109(19), 3055-3068. doi:10.1016/j.neuron.2021.07.011
- 811 Elsayed, G. F., & Cunningham, J. P. (2017). Structure in neural population  
812 recordings: an expected byproduct of simpler phenomena? *Nat Neurosci*,  
813 20(9), 1310-1318. doi:10.1038/nn.4617
- 814 Evarts, E. V. (1968). A technique for recording activity of subcortical neurons in  
815 moving animals. *Electroencephalogr Clin Neurophysiol*, 24(1), 83-86.



- 816 Fetz, E. E., & Cheney, P. D. (1980). Postspike facilitation of forelimb muscle activity  
817 by primate corticomotoneuronal cells. *J Neurophysiol*, *44*(4), 751-772.  
818 doi:10.1152/jn.1980.44.4.751
- 819 Georgopoulos, A. P., Kalaska, J. F., Caminiti, R., & Massey, J. T. (1982). On the  
820 relations between the direction of two-dimensional arm movements and cell  
821 discharge in primate motor cortex. *J Neurosci*, *2*(11), 1527-1537.
- 822 Grafen, A., & Hails, R. (2002). *Modern Statistics for the Life Sciences*. New York:  
823 Oxford university press.
- 824 Hubel, D. H., & Wiesel, T. N. (1959). Receptive fields of single neurones in the cat's  
825 striate cortex. *J Physiol*, *148*, 574-591. doi:10.1113/jphysiol.1959.sp006308
- 826 Humphries, M. D. (2021). Strong and weak principles of neural dimension reduction.  
827 *Neurons, Behavior, Data analysis, and Theory*, *5*(2).
- 828 Jones, J. P., & Palmer, L. A. (1987). An evaluation of the two-dimensional Gabor  
829 filter model of simple receptive fields in cat striate cortex. *J Neurophysiol*,  
830 *58*(6), 1233-1258. doi:10.1152/jn.1987.58.6.1233
- 831 Jun, J. J., Steinmetz, N. A., Siegle, J. H., Denman, D. J., Bauza, M., Barbarits, B., . . .  
832 Harris, T. D. (2017). Fully integrated silicon probes for high-density recording  
833 of neural activity. *Nature*, *551*(7679), 232-236. doi:10.1038/nature24636
- 834 Keemink, S. W., & Machens, C. K. (2019). Decoding and encoding (de)mixed  
835 population responses. *Curr Opin Neurobiol*, *58*, 112-121.  
836 doi:10.1016/j.conb.2019.09.004
- 837 Mante, V., Sussillo, D., Shenoy, K. V., & Newsome, W. T. (2013). Context-  
838 dependent computation by recurrent dynamics in prefrontal cortex. *Nature*,  
839 *503*(7474), 78-84. doi:10.1038/nature12742
- 840 Mountcastle, V., & Henneman, E. (1949). Pattern of tactile representation in thalamus  
841 of cat. *J Neurophysiol*, *12*(2), 85-100. doi:10.1152/jn.1949.12.2.85
- 842 Murray, J. D., Bernacchia, A., Roy, N. A., Constantinidis, C., Romo, R., & Wang, X.  
843 J. (2017). Stable population coding for working memory coexists with  
844 heterogeneous neural dynamics in prefrontal cortex. *Proc Natl Acad Sci U S A*,  
845 *114*(2), 394-399. doi:10.1073/pnas.1619449114
- 846 O'Keefe, J., & Dostrovsky, J. (1971). The hippocampus as a spatial map. Preliminary  
847 evidence from unit activity in the freely-moving rat. *Brain Res*, *34*(1), 171-  
848 175. doi:10.1016/0006-8993(71)90358-1

- 849 Okazawa, G., Hatch, C. E., Mancoo, A., Machens, C. K., & Kiani, R. (2021).  
850 Representational geometry of perceptual decisions in the monkey parietal  
851 cortex. *Cell*, *184*(14), 3748-3761 e3718. doi:10.1016/j.cell.2021.05.022
- 852 Osako, Y., Ohnuki, T., Tanisumi, Y., Shiotani, K., Manabe, H., Sakurai, Y., &  
853 Hirokawa, J. (2021). Contribution of non-sensory neurons in visual cortical  
854 areas to visually guided decisions in the rat. *Curr Biol*, *31*(13), 2757-2769  
855 e2756. doi:10.1016/j.cub.2021.03.099
- 856 Platt, M. L., & Glimcher, P. W. (1999). Neural correlates of decision variables in  
857 parietal cortex. *Nature*, *400*(6741), 233-238.
- 858 Raposo, D., Kaufman, M. T., & Churchland, A. K. (2014). A category-free neural  
859 population supports evolving demands during decision-making. *Nat Neurosci*,  
860 *17*(12), 1784-1792. doi:10.1038/nn.3865
- 861 Rossi-Pool, R., Zainos, A., Alvarez, M., Diaz-deLeon, G., & Romo, R. (2021). A  
862 continuum of invariant sensory and behavioral-context perceptual coding in  
863 secondary somatosensory cortex. *Nat Commun*, *12*(1), 2000.  
864 doi:10.1038/s41467-021-22321-x
- 865 Saxena, S., & Cunningham, J. P. (2019). Towards the neural population doctrine.  
866 *Curr Opin Neurobiol*, *55*, 103-111. doi:10.1016/j.conb.2019.02.002
- 867 Tolhurst, D. J., & Movshon, J. A. (1975). Spatial and temporal contrast sensitivity of  
868 striate cortical neurones. *Nature*, *257*(5528), 674-675. doi:10.1038/257674a0
- 869 Vyas, S., Golub, M. D., Sussillo, D., & Shenoy, K. V. (2020). Computation Through  
870 Neural Population Dynamics. *Annu Rev Neurosci*, *43*, 249-275.  
871 doi:10.1146/annurev-neuro-092619-094115
- 872 Wurtz, R. H. (1968). Visual cortex neurons: response to stimuli during rapid eye  
873 movements. *Science*, *162*(3858), 1148-1150.  
874 doi:10.1126/science.162.3858.1148
- 875 Yamada, H., Imaizumi, Y., & Matsumoto, M. (2021). Neural Population Dynamics  
876 Underlying Expected Value Computation. *J Neurosci*, *41*(8), 1684-1698.  
877 doi:10.1523/JNEUROSCI.1987-20.2020
- 878 Yamada, H., Inokawa, H., Matsumoto, N., Ueda, Y., Enomoto, K., & Kimura, M.  
879 (2013). Coding of the long-term value of multiple future rewards in the  
880 primate striatum. *J Neurophysiol*, *109*(4), 1140-1151.  
881 doi:10.1152/jn.00289.2012

- 882 Yamada, H., Louie, K., Tymula, A., & Glimcher, P. W. (2018). Free choice shapes  
883 normalized value signals in medial orbitofrontal cortex. *Nat Commun*, 9(1),  
884 162. doi:10.1038/s41467-017-02614-w
- 885 Yuste, R. (2015). From the neuron doctrine to neural networks. *Nat Rev Neurosci*,  
886 16(8), 487-497. doi:10.1038/nrn3962
- 887

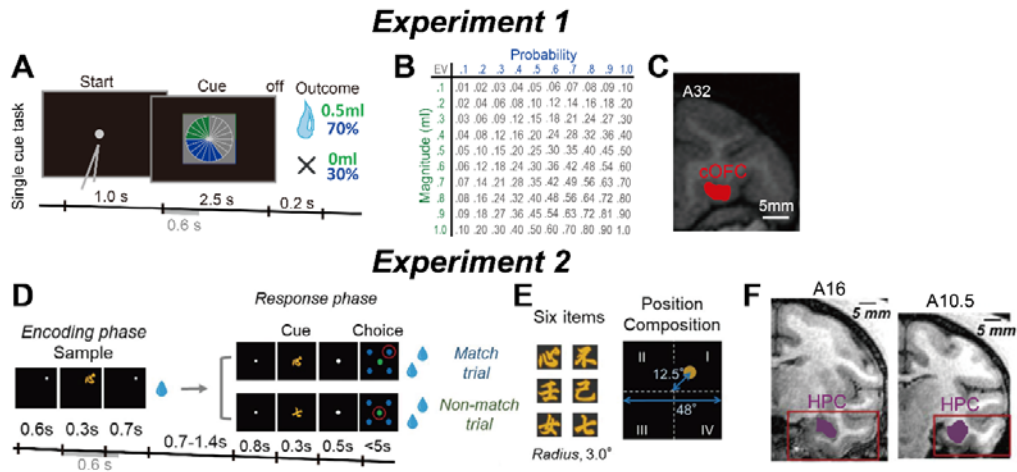

888

889 **Figure 1. Behavioral task and recording location of neurons.**

890 (A) Sequence of events during the single-cue task in Exp. 1. A single visual pie chart  
 891 having green and blue pie segments was presented to the monkeys. Neural activity  
 892 was analyzed during 0.6 s after cue onset, i.e., for the same duration as in Exp. 2.

893 (B) Payoff matrix – each of the magnitudes was fully crossed with each of the  
 894 probabilities resulting in a pool of 100 lotteries. (C) Illustration of neural recording

895 areas based on coronal magnetic resonance (MR) images for the cOFC (13M,  
 896 medial part of area 13) at the A31–A34 anterior–posterior (A–P) level. (D) Sequence

897 of events during the ILR task in Exp. 2. The cue stimulus during the response phase  
 898 was the same as the sample stimulus during the encoding phase in the match trial,

899 while the two stimuli differed in the nonmatch trial. Neural activity was analyzed  
 900 during 0.6 s after sample onset, i.e., for the same duration as in Exp. 1. (E) Six visual

901 item stimuli and spatial composition during the sample period. (F) Coronal MR  
 902 images from monkey A for the HPC population showing the recording area at A16–

903 A10.5 depicted by purple color in the red boxes. Figure 1A was published in Yamada  
 904 et al., 2021. Figure 1D–F was published in Chen et al., 2020.

905

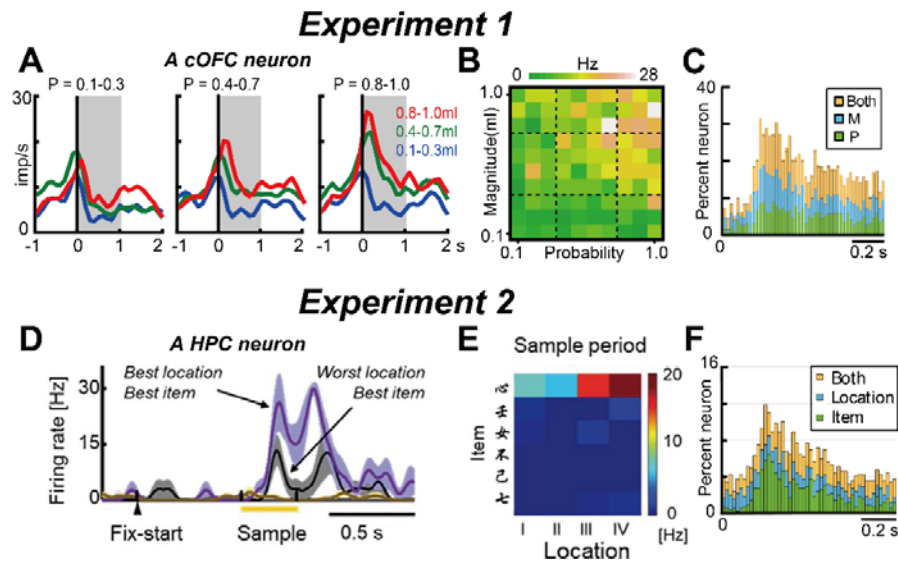

906

907 **Figure 2. Example activity of neurons during the single-cue and ILR tasks.**

908 (A) Example activity histogram of a cOFC neuron modulated by the probability and  
 909 magnitude of rewards during the single-cue task. The activity aligned to the cue  
 910 onset is represented for three different levels of probability (0.1–0.3, 0.4–0.7, 0.8–  
 911 1.0) and magnitude (0.1–0.3 mL, 0.4–0.7 mL, 0.8–1.0 mL) of rewards. Gray hatched  
 912 time windows indicate the 1-s time window used to estimate the neural firing rates  
 913 shown in B. Histograms are smoothed using a Gaussian kernel ( $\sigma = 50$  ms) (B)  
 914 Activity plot of the cOFC neuron during the 1-s time window shown in A against the  
 915 probability and magnitude of rewards. (C) Percentages of neural modulation type: the  
 916 probability (P), magnitude (M), and both (Both) in the 0.02-s time bin during 1.0 s  
 917 after cue onset. The scale bar indicates the 0.2 s. (D) Example of an HPC neuron  
 918 showing sample-triggered sample–location signals and item signals. A 0.08–0.38 s  
 919 time window was used to estimate the neural firing rates shown in E. Histograms are  
 920 smoothed using a Gaussian kernel ( $\sigma = 20$  ms). (E) Activity plot of the HPC neuron  
 921 during the 0.3-s time window shown in A against items and locations. (F)  
 922 Percentages of neural modulation types: item, location, and both (Both) in the 0.02-s  
 923 time bin during 1.0 s after sample onset. Figure 2A–C was published in Yamada et  
 924 al., 2021. Figure 2D–E was published in Chen et al., 2020.

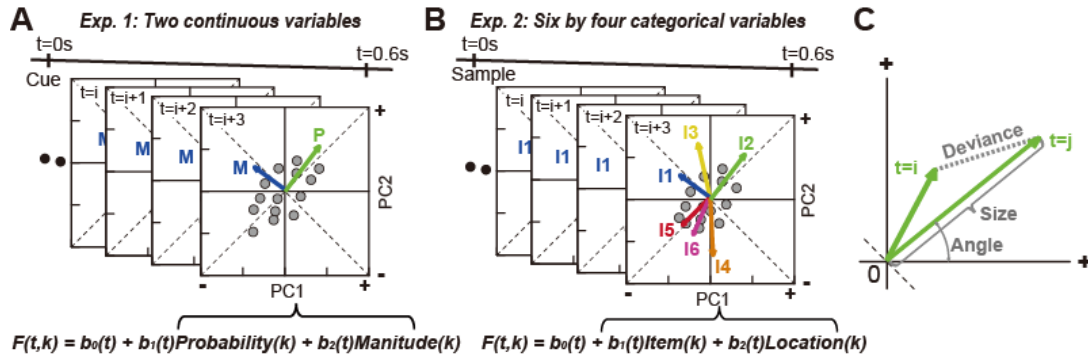

925

926 **Figure 3. Schematic depictions for the analysis of neural-population dynamics**  
 927 **using PCA.**

928 (A) Time series of neural population activity projected to a regression subspace  
 929 composed of probability and magnitude. The eigenvectors for probability and  
 930 magnitude were plotted after coordinate transformation against PC1 and PC2. A  
 931 series of eigenvectors was obtained by applying PCA once to the cOFC population.  
 932 The number of eigenvectors obtained by PCA was 0.6 s divided by the analysis  
 933 window size, 0.02 s, for probability (P) and magnitude (M), hence 30 eigenvectors for  
 934 each. The regression equation is shown at the bottom (see Methods for details). (B)  
 935 Time series of neural population activity projected to a regression subspace  
 936 composed of items and locations. The eigenvectors for six items (I1 to I6) were  
 937 plotted after coordinate transformation against PC1 and PC2 (the eigenvector for  
 938 locations are not shown). A series of eigenvectors was obtained by applying PCA  
 939 once to the HPC population. The number of eigenvectors obtained by PCA was 0.6 s  
 940 divided by the analysis window size, 0.02 s, for the six items and four locations,  
 941 hence 30 eigenvectors for each. The regression equation is shown at the bottom  
 942 (see Methods for details). (C) Characteristics of the eigenvectors evaluated  
 943 quantitatively. Angle: vector angle from the horizontal axis obtained from  $-180^\circ$  to  $180^\circ$ .  
 944 Size: eigenvector length. Deviance: difference between vectors.

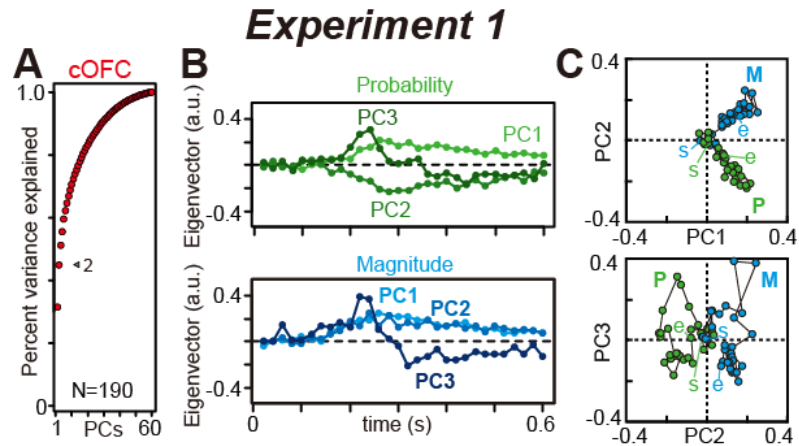

945

946 **Figure 4. The state-space analysis provides a temporal structure of neural**  
947 **modulation in the cOFC.**

948 (A) Cumulative variance explained by PCA in the cOFC population. The arrowhead  
949 indicates the percentages of variances explained by PC1 and PC2. (B) Time series  
950 of eigenvectors for PC1 to PC3 in the cOFC population. (C) Series of eigenvectors  
951 for PC1 to PC3 are plotted against the PC1 and PC2 and PC2 and PC3 dimensions  
952 in the cOFC population. Plots at the beginning and end of the series of vectors are  
953 labeled as start (s) and end (e), respectively. In A–B, a.u. indicates arbitrary unit.

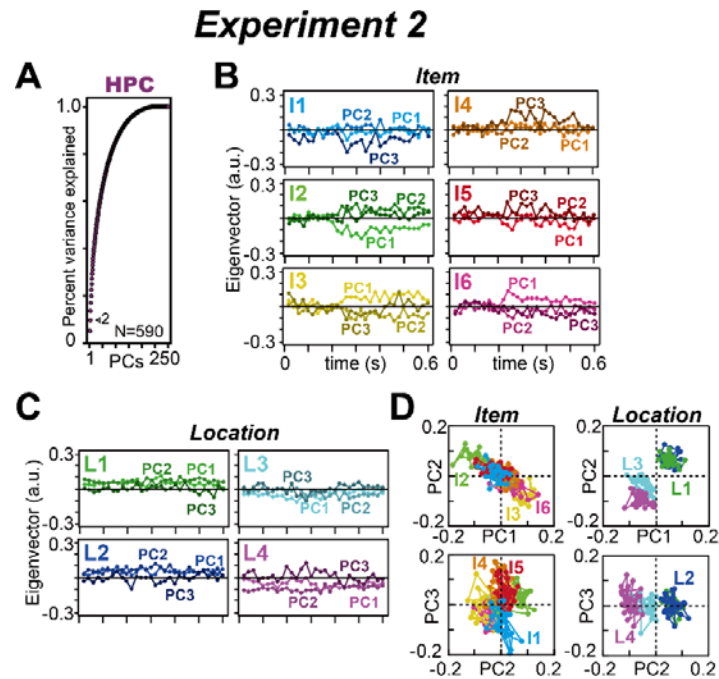

954

955 **Figure 5. Temporal structure of neural modulation in the HPC population.**

956 (A) Cumulative variance explained by PCA in the HPC population. The arrowhead

957 indicates the percentages of variances explained by PC1 and PC2. (B) Time series

958 of eigenvectors for six items in the HPC population. The top three PCs are shown.

959 (C) Same as B but showing the eigenvectors for the four locations. (D) Series of

960 eigenvectors for PC1 to PC3 are plotted against the PC1 and PC2 and PC2 and PC3

961 dimensions in the HPC population. In B–C, a.u. indicates arbitrary unit.

962



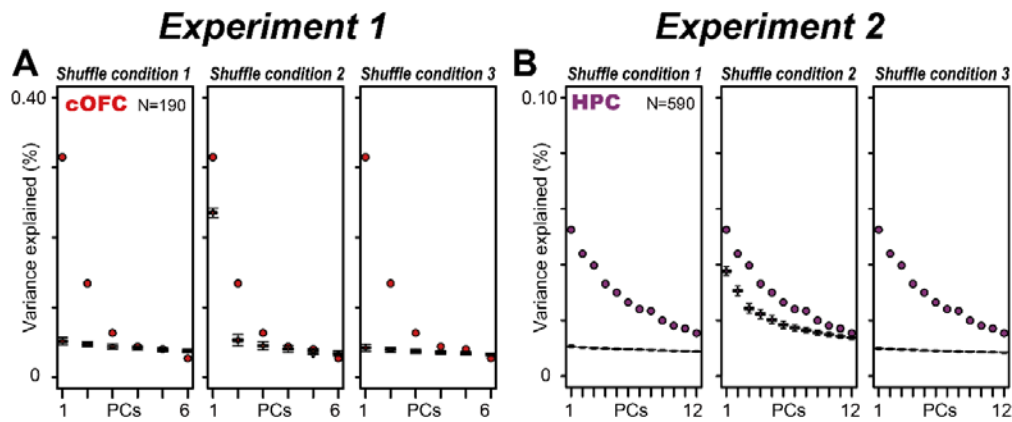

963

964 **Figure 6. Explained variances by PCA in shuffled controls.**

965 (A) Boxplot of explained variances by PCA for PC1 to PC6 for the cOFC population  
966 under the three shuffled conditions (see Methods for details). The plot is not  
967 cumulative. The boxplot was made with 1,000 repeats of the shuffle in each condition.  
968 (B) Same as A, but for the HPC population. In A and B, the colored circles indicate  
969 the variances explained by PCA in each neural population without the shuffles.

## Experiment 2

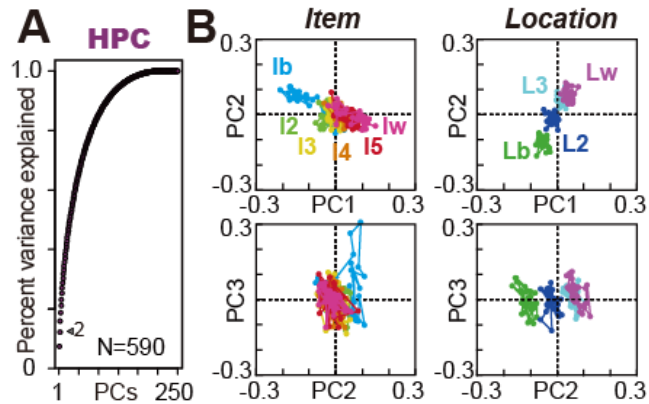

970

971 **Figure 7. Effects of preference ordering on the HPC categorical data.**

972 (A) Cumulative variance explained by PCA in the HPC population when item and  
973 location are ordered according to their activity preferences (see Methods). The  
974 arrowhead indicates the percentages of variances explained by PC1 and PC2. (B)  
975 Series of eigenvectors for PC1 to PC3 when item and location are ordered according  
976 to their preferences plotted against the PC1 and PC2 and PC2 and PC3 dimensions  
977 in the HPC population. Ib and Iw indicate the best and worst items, respectively. I2 to  
978 I5 indicate the 2<sup>nd</sup> to 5<sup>th</sup> best items. Lb and Lw indicate the best and worst locations,  
979 respectively. L2 and L3 indicate the 2<sup>nd</sup> and 3<sup>rd</sup> best locations, respectively.

980

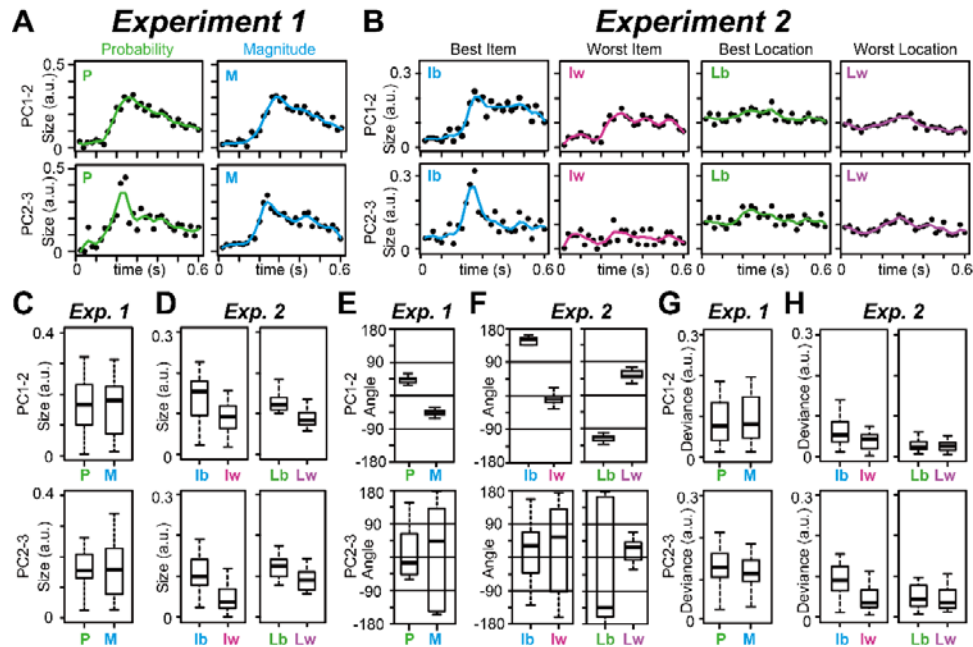

981

982 **Figure 8. Quantitative evaluations of eigenvector properties in the cOFC and**  
 983 **HPC populations.**

984 **(A)** Time series of vector size estimated in the cOFC population for probability (P)  
 985 and magnitude (M) of rewards. The vector sizes are estimated in the PC1 to PC2  
 986 plane (top) and PC2 to PC3 plane (bottom), respectively. a.u. indicates arbitrary unit.  
 987 The solid colored lines indicate interpolated lines using a cubic spline function to  
 988 provide a resolution of 0.005 s. **(B)** Same as A, but for the best and worst items and  
 989 the best and worst locations in the HPC population. **(C)** Box plots of vector size  
 990 estimated in the cOFC population for probability and magnitude of rewards. **(D)**  
 991 Same as C, but for the best and worst items and the best and worst locations in the  
 992 HPC population. **(E–F)** Same as C–D, but for the vector angle estimated in the cOFC  
 993 and HPC populations. **(G–H)** Same as C–D, but from the vector deviance for the  
 994 mean estimated in the cOFC and HPC populations. In C–H, data after 0.1 s are used.

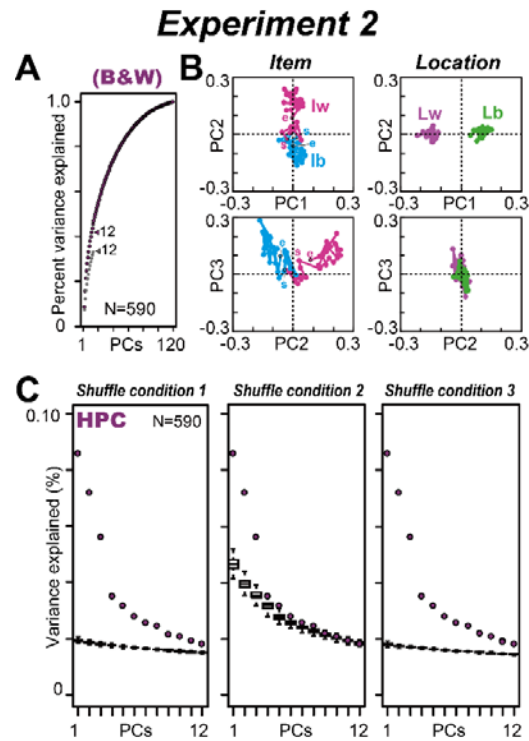

995

996 **Figure 9. Effects of matrix size control in the HPC population.**

997 (A) Cumulative variance explained by PCA in the HPC population when the best and  
998 worst conditions for item and location are used for the regression subspace. The gray  
999 dots indicated the percent variance explained by the PCA when using the full matrix.  
1000 The first 12 PCs are shown. (B) Time series of eigenvectors for PC1 to PC3 when  
1001 the best and worst items and the best and worst locations are used. lb and lw  
1002 indicate the best and worst items, respectively. Lb and Lw indicate the best and worst  
1003 locations, respectively. s and e indicate the start and end of the time series of vectors,  
1004 respectively. (C) Boxplot of explained variances by PCA for PC1 to PC12 under the  
1005 three shuffled conditions (see Methods for details). The plot is not cumulative. The  
1006 boxplot was made with 1,000 repeats of the shuffle in each condition. The colored  
1007 circles indicate the variances explained by PCA in the HPC population without the  
1008 shuffles.
